# Supplementary material
Source: PubMed Central journal article supplement (PMC3191005)
Supplement: supp_M111.268094_jbc.M111.268094-2.pdf [file supp_M111.268094_jbc.M111.268094-2.pdf]

## Supplemental Figure S2

A.

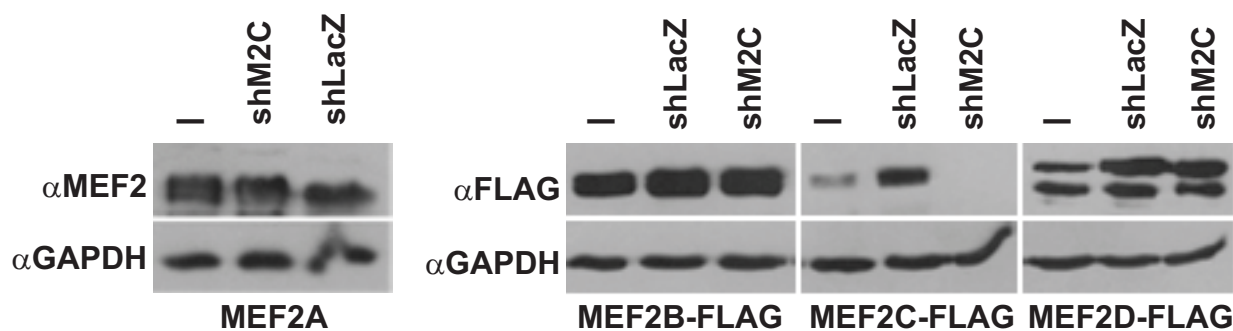

B.

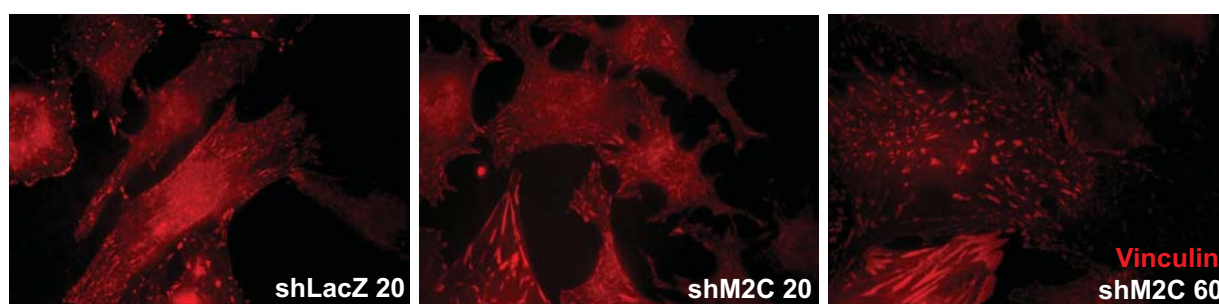

C.

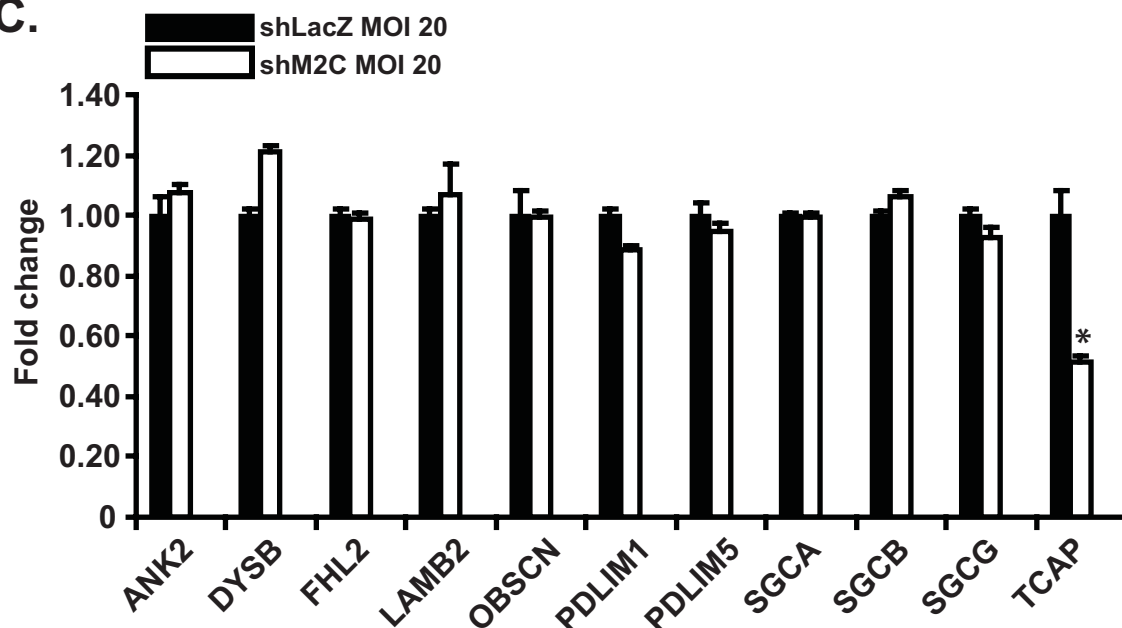

Supplemental Figure S2. MEF2C shRNA does not affect cardiomyocyte structural integrity. A, Efficacy and specificity of MEF2C-specific shRNA (shM2C). COS cells co-transfected with shM2C and various MEF2 expression plasmids reveals robust knockdown of MEF2C but not other MEF2 proteins. B, NRVMs transduced with MEF2C-specific shRNA adenovirus at a MOI of 20 and 60 does not perturb vinculin localization. C, Quantitative RT-PCR analysis of costamere genes from MEF2C knockdown NRVMs shows that only one costamere gene is significantly downregulated.
