# Supplementary material
Source: PubMed Central journal article supplement (PMC3191005)
Supplement: supp_M111.268094_jbc.M111.268094-3.pdf [file supp_M111.268094_jbc.M111.268094-3.pdf]

## Supplemental Figure S3

FHL2

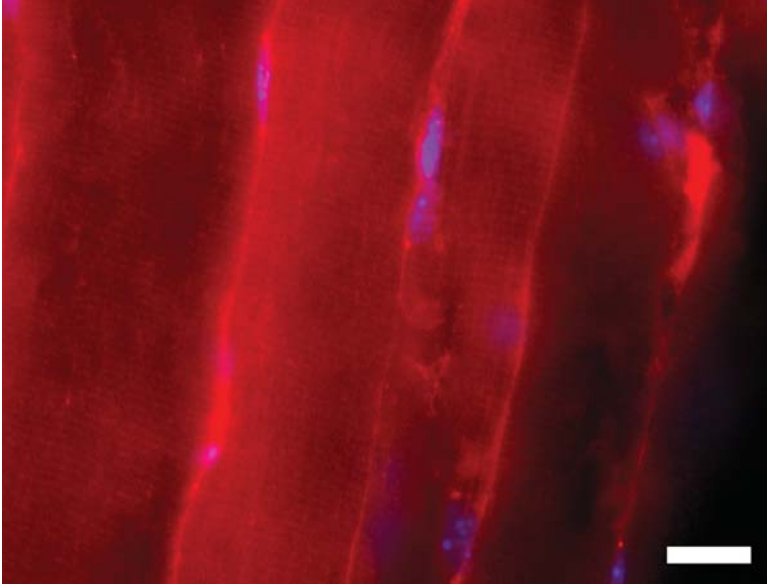

TCAP

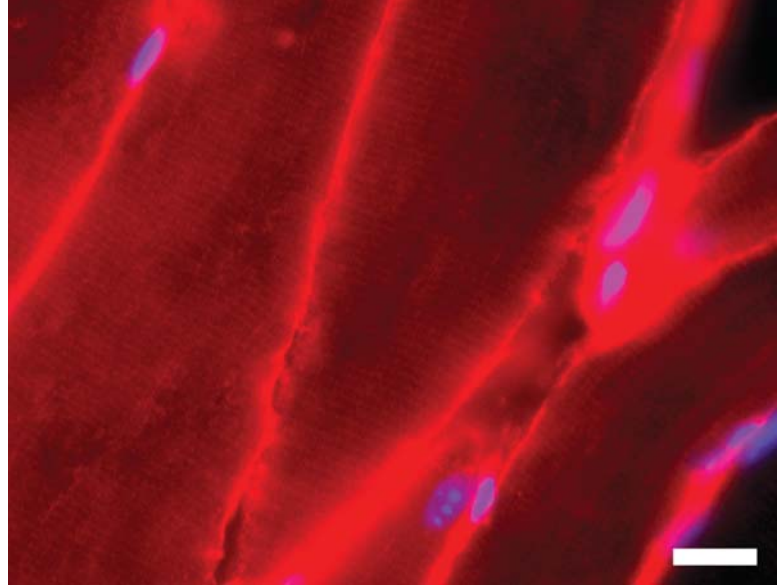

Supplemental Figure S3. Immunofluorescence analysis of FHL2 and TCAP localization in adult mouse skeletal muscle. The FHL2 and TCAP antibodies used in this study reveal a striated pattern of expression in longitudinal skeletal muscle sections consistent with the subcellular localization of these proteins. White bars, 10  $\mu\text{m}$ .
